# Supplementary material for: Parallel design strategy and rational study of crystal engineering of novel 3,4-ethylenedioxythiophene derivatives for solid state polymerization
Source: Royal Society of Chemistry journal article supplement (doi:10.1039/c4ra01688b), 2014-06-04
Supplement: c4ra01688b1.pdf [file c4ra01688b1.pdf]

Electronic Supporting Information  
*For*  
**Parallel Design Strategy and Rational Study of Crystal Engineering of Novel 3,4-Ethylenedioxythiophene Derivatives for Solid State Polymerization**

Chuong Tusy, Lili Huang, Kai Peng, Jiangbin Xia\*

*College of Chemistry and Molecular Science, Wuhan University, Wuhan 430072, China*

Corresponding author. E-mail: jbxia@whu.edu.cn

Tel & Fax: 86-27-67856707

**Contents**

- 1. DSC scans of the monomers**
- 2. In-situ XRD patterns for Br<sub>2</sub>-P-EDOT**

**1. DSC scans of the monomers**

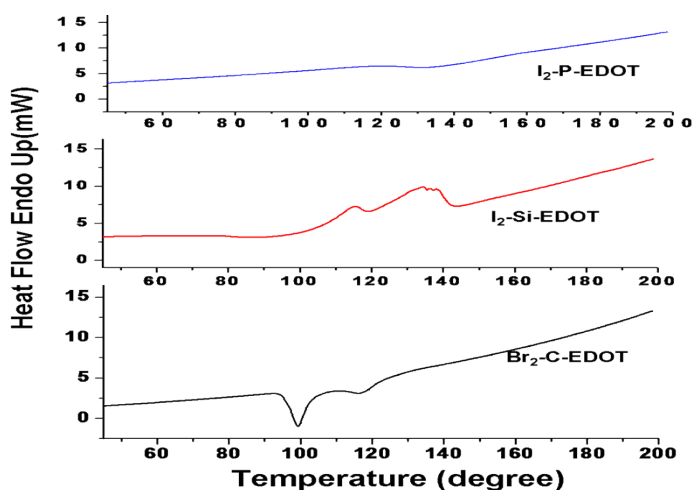

**Figure S1.** DSC scans of the monomers at a heating scan rate of 10 °C /min.

The DSC curves shows that these monomers melt points are over 80 °C. Meanwhile, Br<sub>2</sub>-C-EDOT shows exothermic polymerization peaks around 98 °C and small one around 115 °C. However, I<sub>2</sub>-P-EDOT shows weak peak around 135 °C. While in the case of I<sub>2</sub>-Si-EDOT, it seems that it has two endothermic peak. The former peak may be related with its T<sub>g</sub> and the second one may related to phase transformation or others.

## 2. In-situ XRD patterns for I<sub>2</sub>-P-EDOT

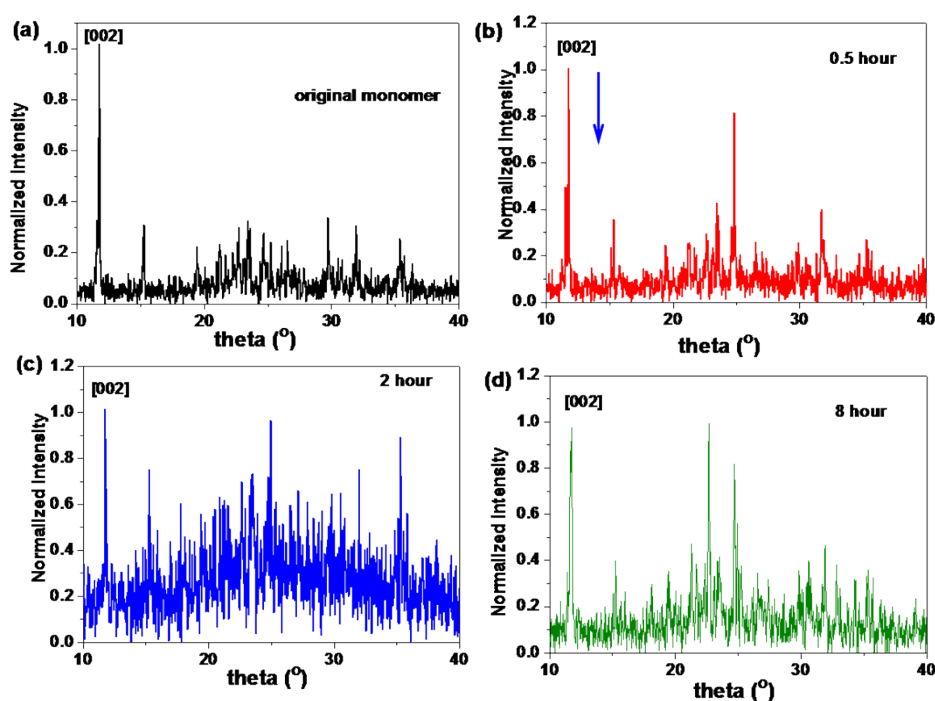

**Figure S2.** In-situ XRD patterns of the monomer of I<sub>2</sub>-P-EDOT at different annealing time at 80 °C.

In order to find solid evidence of the initial polymerization procedure,

monomer of I<sub>2</sub>-P-EDOT was selected as an example and its in-situ XRD patterns were presented in FigS2. It is obviously that drastic decrease of [002] phase intensity was observed at the initial 2 hours' polymerization, which means that the initial polymerization occurs at the ab-plane in the crystal. Therefore, such result is well consistent with our prediction of the most possible 1<sup>st</sup> polymerization pathway along *b*-axis direction at crystal analysis.
